# Supplementary material for: A one-pot synthesis of a monolithic Cu2O/Cu catalyst for efficient ozone decomposition
Source: Royal Society of Chemistry journal article supplement (doi:10.1039/d0ra05157h), 2020-01-01
Supplement: d0ra05157h1.pdf [file d0ra05157h1.pdf]

## Supporting Information

### One-pot Synthesis of Monolithic Cu<sub>2</sub>O/Cu Catalyst for Efficient Ozone Decomposition

*Mohammad Ghasem Rahimi<sup>a,b</sup>, Anqi Wang<sup>a,b</sup>, Guojun Ma<sup>c,d</sup>, Ning Han<sup>a,c\*</sup>, Yunfa Chen<sup>a,c\*</sup>*

<sup>a</sup> State Key Laboratory of Multiphase Complex Systems, Institute of Process Engineering, Chinese Academy of Sciences, Beijing 100190, PR China

<sup>b</sup> Center of Materials Science and Optoelectronics Engineering, University of Chinese Academy of Sciences, Beijing, 100049, China

<sup>c</sup> Center for Excellence in Regional Atmospheric Environment, Institute of Urban Environment, Chinese Academy of Sciences, Xiamen 361021, PR China

<sup>d</sup> Key laboratory of science and technology on particle materials, Chinese academy of sciences, Beijing 100190, PR China.

\*Corresponding authors:

N. Han, Email: [nhan@ipe.ac.cn](mailto:nhan@ipe.ac.cn). Tel.:86-10-62558356, Fax: 86-10-62525716

Y. Chen, Email: [chenyf@ipe.ac.cn](mailto:chenyf@ipe.ac.cn). Tel.:86-10-82544896, Fax: 86-10-62525716, Post: P.O. Box 353, Beijing 100190, PR China

**Table S1. The NH<sub>4</sub>OH:HCl ratio optimization by the ozone decomposition activity**

|             | 0 $\mu$ L NH <sub>4</sub> OH                                 | 1*27 $\mu$ L NH <sub>4</sub> OH                              | 2*27 $\mu$ L NH <sub>4</sub> OH | 3*27 $\mu$ L NH <sub>4</sub> OH    | 4*27 $\mu$ L NH <sub>4</sub> OH |
|-------------|--------------------------------------------------------------|--------------------------------------------------------------|---------------------------------|------------------------------------|---------------------------------|
| 0 mL HCl    | -                                                            | The Cu foam would dissolve gradually                         |                                 |                                    |                                 |
| 0.2 mL HCl  | Cu foam would keep unchanged and no performance was detected | No performance                                               | No performance                  | The sample was partially dissolved |                                 |
| 0.32 mL HCl |                                                              | No performance                                               | No performance                  |                                    |                                 |
| 0.4 mL HCl  |                                                              | ~ 85% at 12 h aging time                                     | No performance                  |                                    |                                 |
| 0.48 mL HCl |                                                              | ~ 42% at 8 h aging time                                      | No performance                  |                                    |                                 |
| 0.6 mL HCl  |                                                              | Cu foam would keep unchanged and no performance was detected |                                 |                                    |                                 |

The concentration of NH<sub>4</sub>OH and HCl are 13.38 and 1M, respectively.

All experiments have been done at reaction time 8 and 12 h.

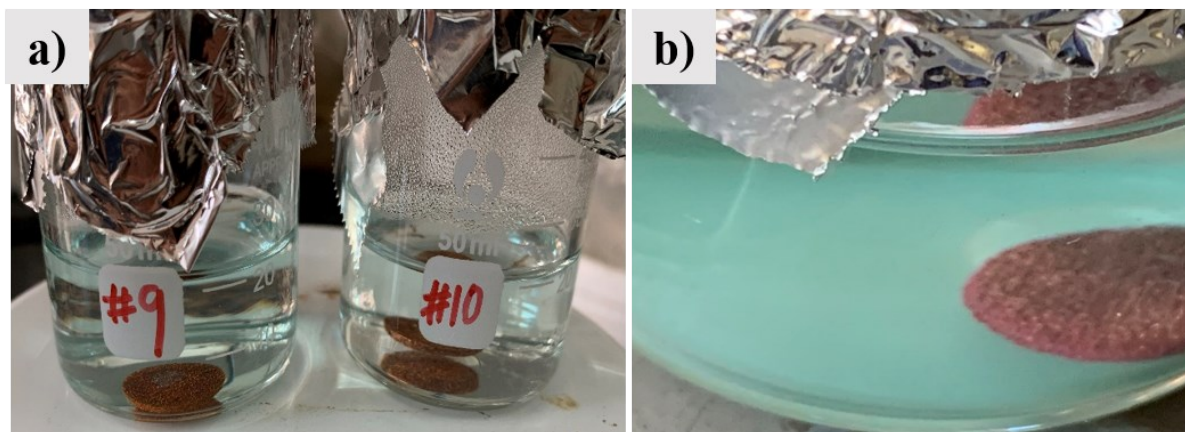

**Figure S1.** The color changed to blue (a) after 15 minutes, and precipitate (b) after 2 h.

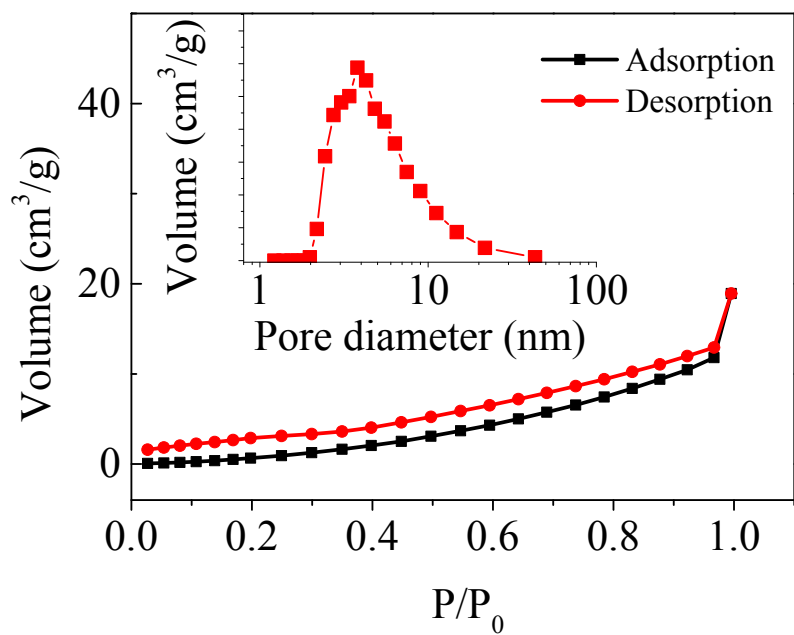

Figure S2. The N<sub>2</sub> adsorption/desorption isotherm of the Cu<sub>2</sub>O/Cu catalyst.

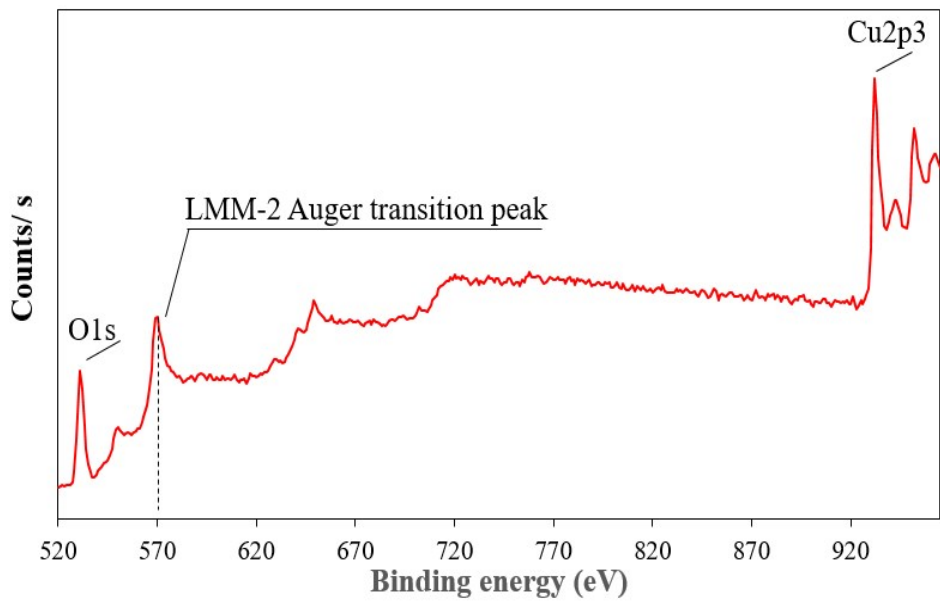

**Figure S3. The LMM-2 Auger transition peak located at 570 eV**
